# Supplementary material
Source: publisher figshare collection journal article supplement (https://frontiersin.figshare.com/ndownloader/files/32162564)
Supplement: Supplementary file [file 32162564]

## Supplementary Table and Figure

Table S1. Structural statistics for the rSsp1a ensemble

### Experimental restraints

|                                 |     |
|---------------------------------|-----|
| Interproton distance restraints | 395 |
| Intraresidue                    | 106 |
| Sequential                      | 126 |
| Medium range (i-j < 5)          | 57  |
| Long range (i-j ≥ 5)            | 106 |
| Dihedral-angle restraints       | 32  |
| Hydrogen bonds                  | 16  |

### R.m.s. deviations from mean coordinate structure (Å)

|                                |                 |
|--------------------------------|-----------------|
| Backbone atoms (residue 1-17)  | $0.76 \pm 0.27$ |
| All heavy atoms (residue 1-17) | $1.38 \pm 0.22$ |

### Ramachandran Statistics

|                                  |     |
|----------------------------------|-----|
| % in most favoured region        | 79% |
| % in additionally allowed region | 21% |

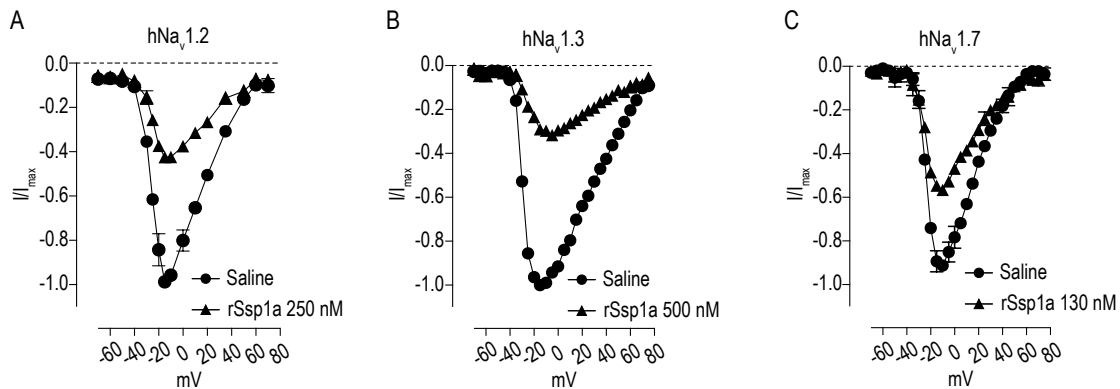

Figure S1. Effect of rSsp1a on current-voltage relationship of hNav1.2, hNav1.4 and hNav1.7. The ~IC<sub>50</sub> rSsp1a reduced the peak current without significantly affecting the activation threshold, activation voltage and reversal potential. Each data point in the curve is mean  $\pm$  SEM with  $n = 3-4$ .
